# Supplementary material for: Knowledge of and attitudes towards hepatitis B and its transmission from mother to child among pregnant women in Guangdong Province, China
Source: PubMed Central journal article supplement (PMC5456270; doi:10.1371/journal.pone.0178671), 2017-06-02
Supplement: pone.0178671.s002.pdf [file pone.0178671.s002.pdf]

## 乙肝病毒母婴传播相关知识的调查问卷

### 孕妇知情同意书

项目负责人姓名: 侯红璜, 林潮双, **Stephan Ehrhardt, Chloe L Thio, Kenrad Nelson**

项目名称: 乙肝病毒母婴垂直传播知识调查问卷

IRB No.: [2013]2-120/IRB00005636

版本/日期: 2014-1-6

您好!

您已被邀请参与关于孕妇慢性乙型肝炎的预防和治疗的知识 and 态度调查。该项研究由中山大学和约翰斯·霍普金斯大学共同开展。您的答案对我们了解中国孕妇的 HBV 认知程度非常重要。

这是一项匿名调查, 您的参与完全是自愿的。我们不会将您的答案向我们的研究团队以外的任何人泄露。我们将通过匿名和对问卷使用特殊编码的形式保证您的资料安全。同时我们将把所有问卷统一锁放在感染科的文档柜中。研究人员在使用您的信息时都将遵循以上的保护措施。因此, 您参与本研究不会发生任何风险。

您将需要约 10 分钟时间来回答所有问题。如果您不知道答案, 您可以选择“不知道”。如果您对任何问题有不明白的地方, 可以咨询研究协调员, 他们将向您解答。因为本调查完全是自愿的, 您不是必须回答所有问题, 您随时有权拒绝参与及退出研究。

调查之后如果您对有任何问题, 您可以联系淦伟强 (86-20-13560195664, ganweiqiang@aliyun.com) 或廖思莹 (86-20-18922103021, seeingseeing@163.com)。

请您注意, 当您回答问题并交回问卷时, 就证明您已经同意参加这项研究了。

## 乙肝病毒母婴传播相关知识的调查问卷

### 基本资料

年龄: 1 = 18-25, 2= 26-35, 3= 36-45, 4= 46-55, 5= 56-65

您是否有乙肝病毒感染? 1= 有, 2= 没有, 3= 不知道

您有几个孩子 (不包括现在怀孕的这胎)? 1=0 个, 2=1 个, 3=1 个以上

教育程度: 1=文盲, 2=小学, 3=初中, 4=高中, 5=大专或本科, 6=硕士或以上

### 知识

|                                                  | 是 | 不是 | 不知道 |
|--------------------------------------------------|---|----|-----|
| 乙型肝炎是由病毒引起的                                      |   |    |     |
| 乙型肝炎可以通过血液传播                                     |   |    |     |
| 乙型肝炎可以通过无保护性行为传播                                 |   |    |     |
| 乙型肝炎可以通过母亲传播给胎儿                                  |   |    |     |
| 乙型肝炎可以通过不安全的针头或尖锐物传播                             |   |    |     |
| 一个人可以同时感染乙型肝炎和艾滋病                                |   |    |     |
| 乙型肝炎可以导致肝癌                                       |   |    |     |
| 乙型肝炎可以导致肝硬化                                      |   |    |     |
| 病人感染乙型肝炎时可以没有任何症状                                |   |    |     |
| 目前是有乙肝疫苗的                                        |   |    |     |
| 宝宝从母亲那里感染乙肝 (在分娩时或者接近分娩时), 今后并发肝纤维化, 肝硬化和肝癌的风险更高 |   |    |     |

### Attitudes 态度

|                                                          | 愿意 | 不愿意 | 不知道 |
|----------------------------------------------------------|----|-----|-----|
| 产前检查时您是否愿意接受乙型肝炎相关的血液检查?                                 |    |     |     |
| 您是否愿意让您的宝宝注射乙肝疫苗?                                        |    |     |     |
| 假设您感染了乙肝, 您是否愿意让您的宝宝注射抗乙肝抗体?                             |    |     |     |
| 假设您感染了乙肝, 为了防止将乙肝传染给宝宝, 您愿意接受那些对宝宝发育无害的药物治疗?             |    |     |     |
| 您是否愿意带宝宝在生后第一年内回医院检查宝宝的乙肝病染情况?                           |    |     |     |
| 假设您感染了乙肝, 您是否愿意让我们在临床研究过程中为您的宝宝抽血检查? (大概抽 5 次血, 每次 2 毫升) |    |     |     |
